# Supplementary material for: Green and facile approach to prepare polypropylene/in situ reduced graphene oxide nanocomposites with excellent electromagnetic interference shielding properties
Source: Royal Society of Chemistry journal article supplement (doi:10.1039/c8ra05007d), 2018-01-01
Supplement: c8ra05007d1.pdf [file c8ra05007d1.pdf]

**Supplementary information:**

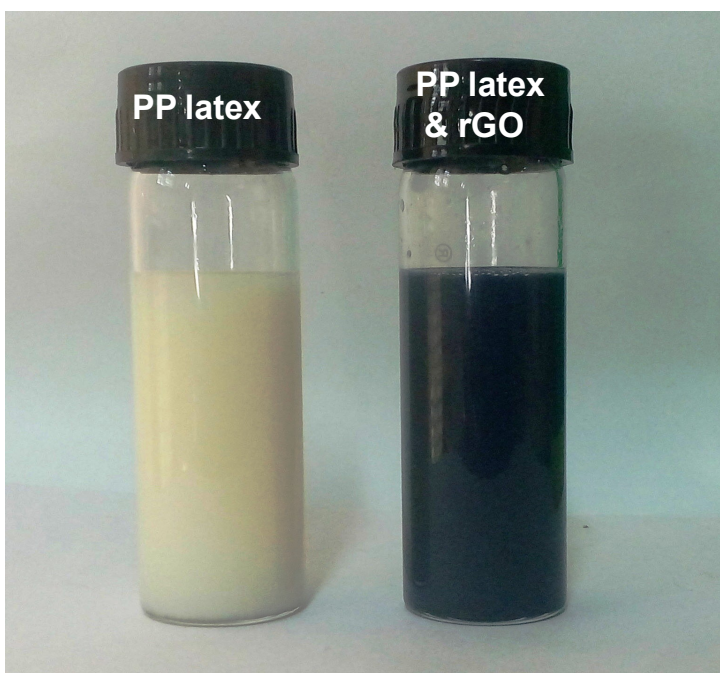

**Figure S1** Photographs of PP latex emulsion and PP latex emulsion/in situ reduced GO mixture after 24 h reduction process.
